# Supplementary material for: Scalable fabrication of multi-layered Cu-based electrodes via solvent-free method for the selective electrochemical conversion of CO2 to C2+ products
Source: Royal Society of Chemistry journal article supplement (doi:10.1039/d4gc00711e), 2024-01-01
Supplement: d4gc00711e1.pdf [file d4gc00711e1.pdf]

# **Scalable fabrication of multi-layered Cu-based electrodes via solvent-free method for the selective electrochemical conversion of CO<sub>2</sub> to C<sub>2+</sub> products**

Supplementary Information

*Measurement setup for gas permeability*

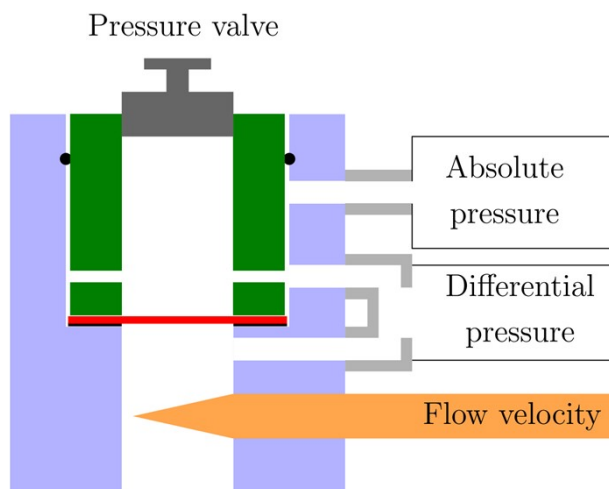

**Figure S1:** A schematic representation of the gas permeation measuring cell shows the electrode (highlighted in red) installed with a flat seal inside the gas-carrying channel.

*Product distribution of inhomogeneous coated CL*

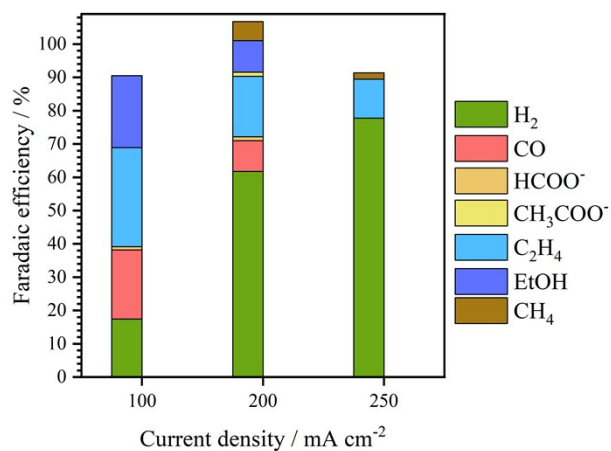

**Figure S2:** Product distribution of Cu-based GDE with a loading of 0.5 mg/cm<sup>2</sup>

### *Fabrication of large electrodes*

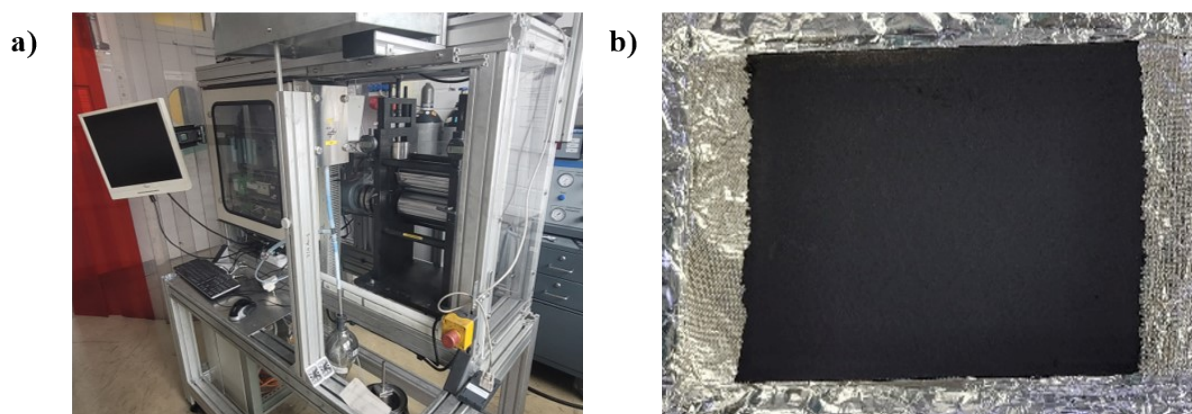

**Figure S3:** a) Real image of production line. b) Appearance of an electrode using the proposed solvent-free method.

### *Critical parameters adjusted for the fabrication of GDEs*

| Types of carbon support in GDL | PTFE content in CL [%] | Mass loading [ $\text{mg}\cdot\text{cm}^{-2}$ ] | Rolling speed [Hz] | Heat-treatment [K] |
|--------------------------------|------------------------|-------------------------------------------------|--------------------|--------------------|
| AB                             | 40                     | 1                                               | 2                  | 373                |
|                                | 40                     | 1                                               | 2                  | 473                |
|                                | 40                     | 1                                               | 2                  | 613                |
|                                | 40                     | 0.5                                             | 2                  | 613                |
|                                | 40                     | 1                                               | 10                 | 613                |
| VC                             | 40                     | 1                                               | 2                  | 613                |
| HSAG                           |                        |                                                 |                    |                    |
| AB                             |                        |                                                 |                    |                    |
| AB                             | 20                     |                                                 |                    |                    |
|                                | 40                     |                                                 |                    |                    |
|                                | 60                     |                                                 |                    |                    |

**Table S1:** Elucidating key parameters during the solvent-free procedure (AB-Acetylene Black, VC- Vulcan XC 72, HSAG-High surface area graphite; Grey: Reference, state-of-the art GDEs, Yellow: Processing parameters, Light blue: GDE parameters)

*Potential course during the long-term measurement*

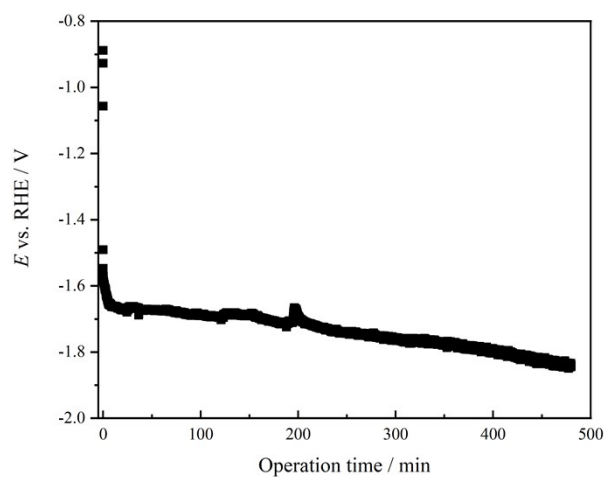

**Figure S4:** Potential on cathode recorded during the long-term measurement

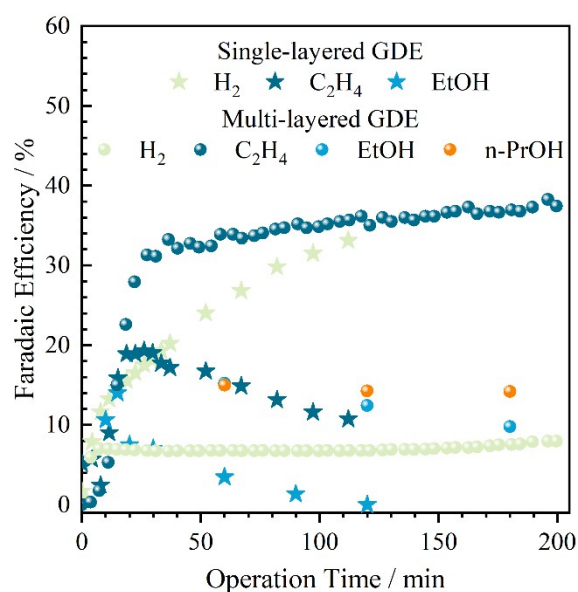

**Figure S5:** Comparison of stability performance of the multi- (bullet) and single-layered (star) GDE at  $-200 \text{ mA/cm}^2$  with selectivity presented.
